# Supplementary material for: Adverse Effect of the Duration of Antibiotic Use Prior to Immune Checkpoint Inhibitors on the Overall Survival of Patients with Recurrent Gynecologic Malignancies
Source: MDPI journal article supplement (doi:10.3390/cancers15245745), 2023-12-07
Supplement: s1 [file s1]

## Supplementary Materials:

**Supplementary Table S1.** Initial stage according to the primary tumor site.

| Tumor sites | Initial stage |            |            |            | Total      |
|-------------|---------------|------------|------------|------------|------------|
|             | I             | II         | III        | IV         |            |
| Endometrium | 11 (30.6%)    | 6 (16.7%)  | 10 (27.8%) | 9 (25.0%)  | 36 (100%)  |
| Ovary       | 3 (2.7%)      | 9 (8.0%)   | 70 (62.5%) | 30 (26.8%) | 112 (100%) |
| Cervix      | 15 (28.3%)    | 17 (32.1%) | 13 (24.5%) | 8 (15.1%)  | 53 (100%)  |
| Others      | 9 (64.3%)     | 2 (14.3%)  | 3 (21.4%)  | 0          | 14 (100%)  |

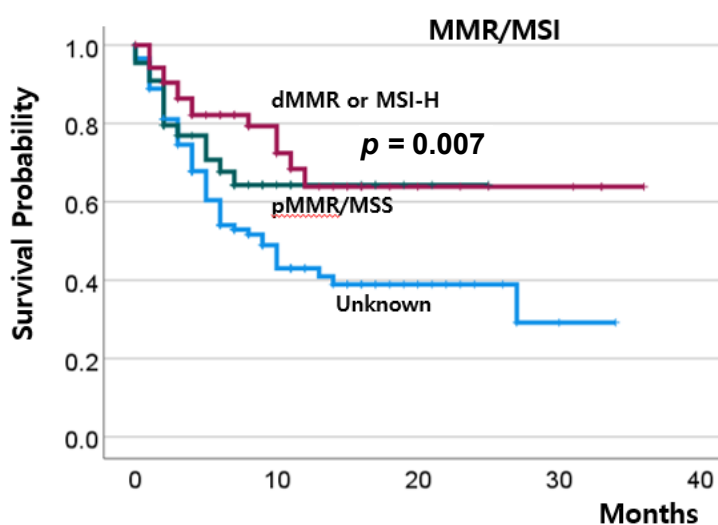

**Supplementary Figure S2.** Overall survival according to the MMR/MSI status dMMR, deficient mismatch repair; pMMR, proficient mismatch repair; MSI-H, microsatellite instability high; MSS, microsatellite instability stable.

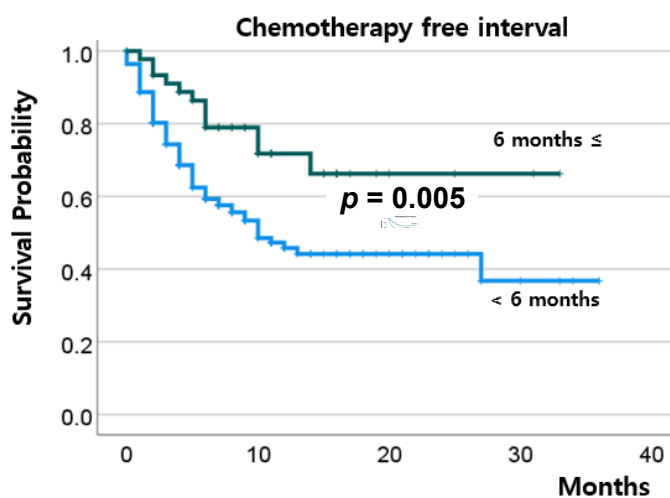

**Supplementary Figure S3.** Overall survival according to the chemotherapy-free interval.

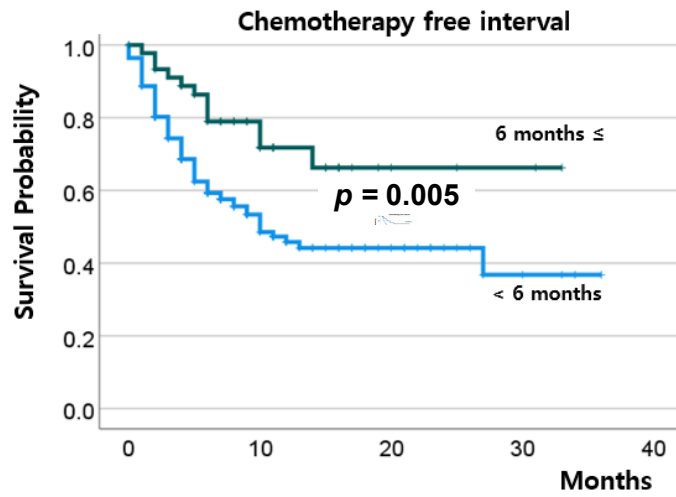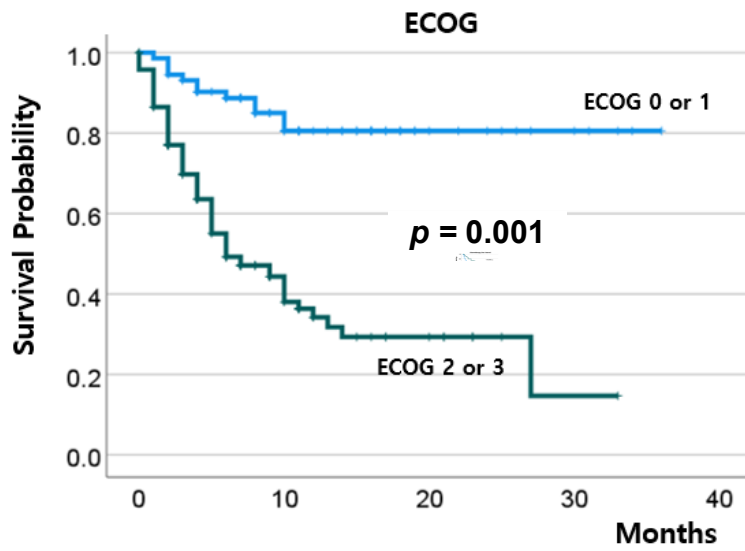

Supplementary Figure S4. Overall survival according to the ECOG status.

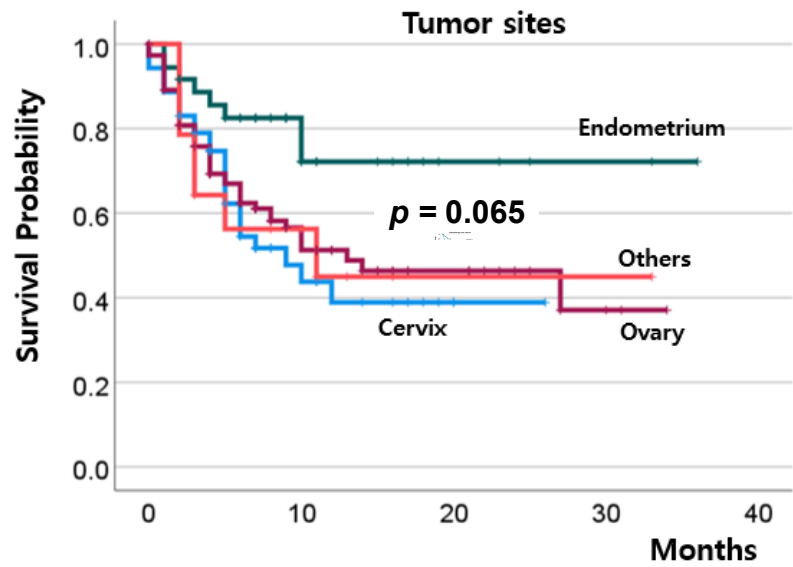

**Supplementary Figure S5.** Overall survival according to the tumor site (the others include the vulva and vagina).

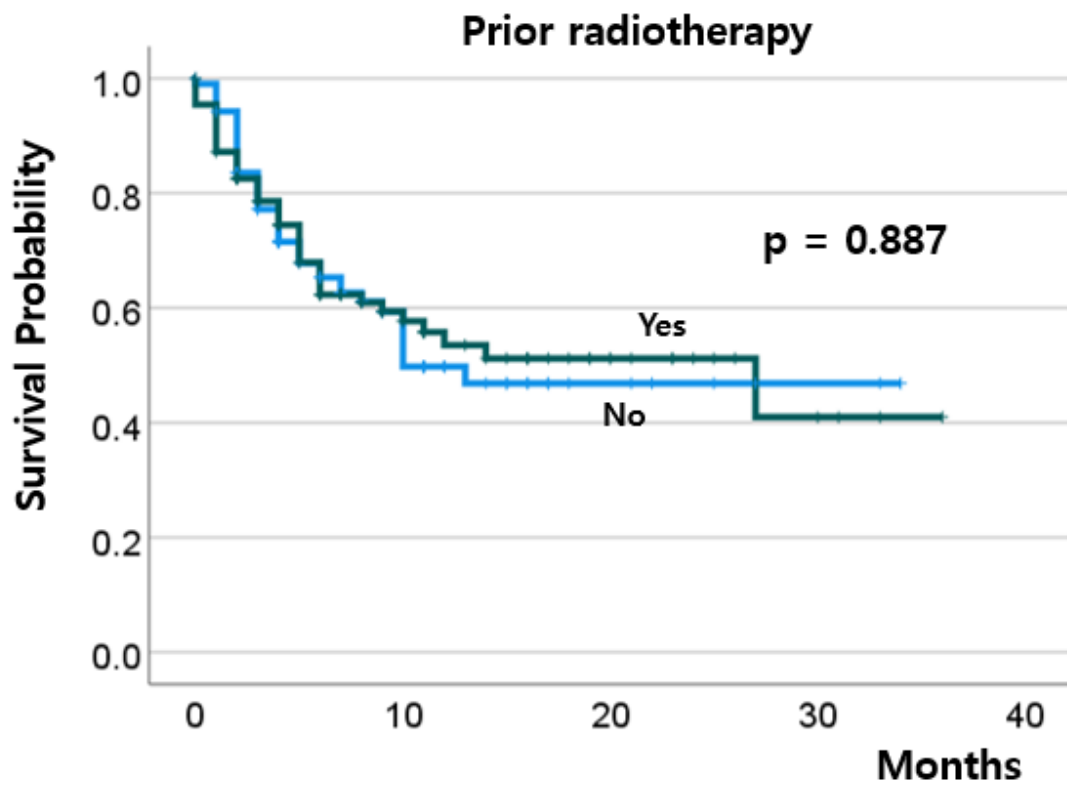

**Supplementary Figure S6.** Overall survival according to prior radiotherapy.

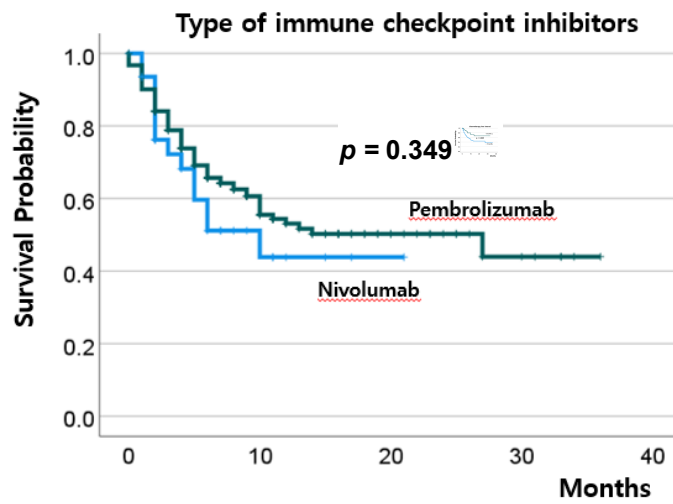

**Supplementary Figure S7.** Overall survival according to the type of immune checkpoint inhibitor.

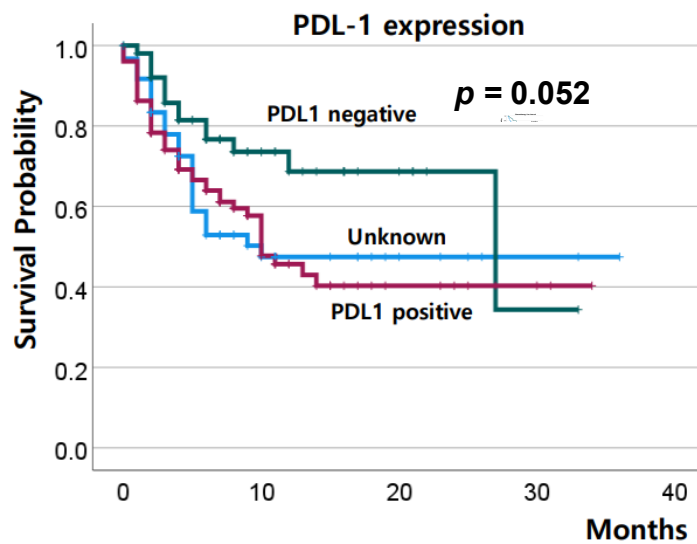

**Supplementary Figure S8.** Overall survival according to the PD-L1 expression.

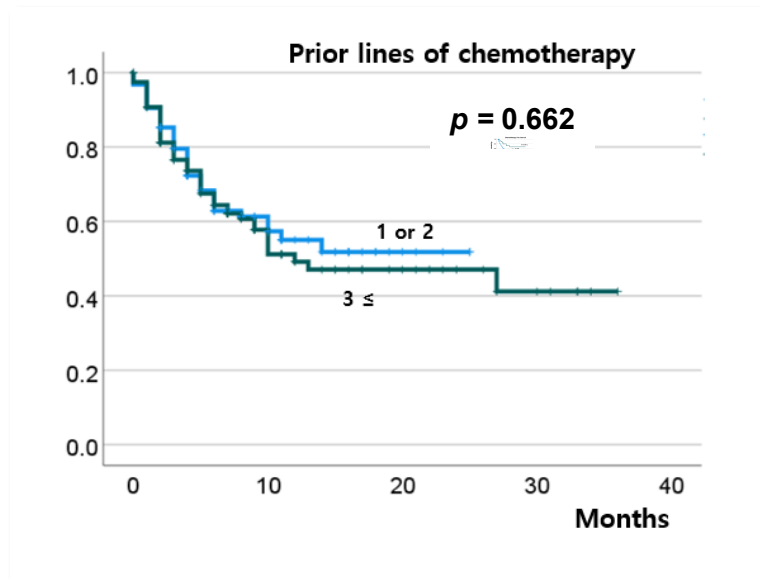

**Supplementary Figure S9.** Overall survival according to the prior lines of chemotherapy.

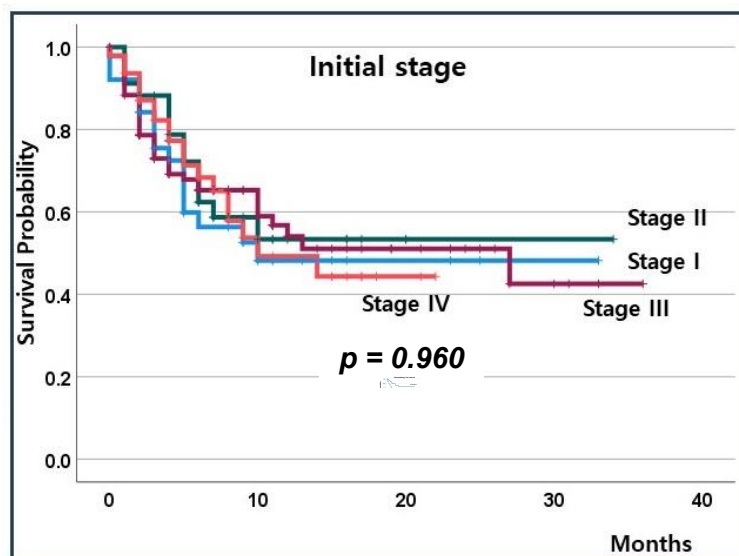

**Supplementary Figure S10.** Overall survival according to the initial stage.

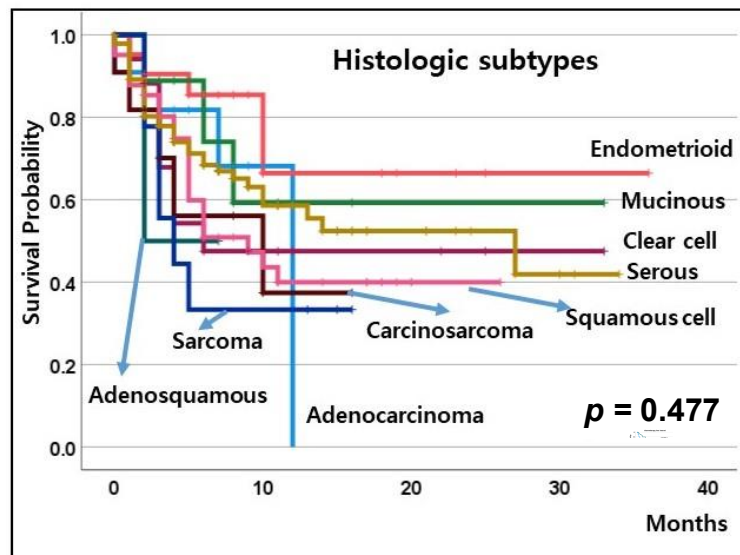

Supplementary Figure S11. Overall survival according to the histologic type.
